# Supplementary material
Source: PubMed Central journal article supplement (PMC6010355)
Supplement: 10-1055-s-0038-1660438-s180029ra.pdf [file 10-1055-s-0038-1660438-s180029ra.pdf]

**Supplementary Material: iDECIDE Recruitment Survey**

\*Required

1. Your name \*

\_\_\_\_\_

2. Your date of birth \* Example: December 15, 2012

\_\_\_\_\_

3. Your weight \*

\_\_\_\_\_ (lbs)

4. Your gender \* Check all that apply.

 Female Male

5. Do you use fitness apps or wearable devices to track your meals, exercise, and alcohol related activities? Provide details \*

\_\_\_\_\_

**Meal Activities Related Questions**

6. How do you know about the effects of carbs on blood glucose? \*(Please select all that apply)

 Physician/Nurse Web site From other patients Trial and error Pamphlets or books I don't know much about the effects Other: \_\_\_\_\_

7. How do you calculate your meal's carbs? \*(Please select all that apply)

 Food label Online food database Personal estimation Clinician's or Educator's suggested approach I don't calculate Other: \_\_\_\_\_

8. How do you compensate for carbs intake? \*(Please select all that apply)

 Insulin bolus, following insulin pump advice Insulin bolus, my own estimation Insulin bolus, following online calculator recommendations Basal adjustment Square delivery adjustment I don't compensate Other: \_\_\_\_\_

9. Do you skip carbs calculations for any reason? Provide details \*

\_\_\_\_\_

**Exercise Related Questions**

10. Do you exercise? \*

 Yes No

11. How frequently do you exercise? \*

 Daily 4 to 6 days a week 2 to 3 days a week Once a week I don't exercise

12. How long do you exercise in one session? \*

 More than 60 minutes Between 30 and 60 minutes Less than 30 minutes Varies I don't exercise

13. What is your preferred time for exercising? \*(Please select all that apply)

 Morning Afternoon Evening Varies I don't exercise Other: \_\_\_\_\_

14. What type of exercise do you prefer? \*(Please select all that apply)

 Cardio Circuit training Aerobics Strength training Stretching and balance Hiking I don't exercise Other: \_\_\_\_\_

15. If you exercise, when do you check your blood glucose? \*(Please select all that apply)

 Before After During I don't check blood glucose Other: \_\_\_\_\_

16. How do you know about the effects of exercise on blood glucose? \*(Please select all that apply)

 Physician/Nurse Web site From other patients Trial and error Pamphlets or books I don't know much about the effects Other: \_\_\_\_\_

17. How do you compensate for your blood glucose levels related to exercise? \* (Please select all that apply)

|                     | Before exercise | During exercise | After exercise | I don't compensate |
|---------------------|-----------------|-----------------|----------------|--------------------|
| Remove insulin pump |                 |                 |                |                    |
| Eat snack/food      |                 |                 |                |                    |
| Adjust basal rate   |                 |                 |                |                    |
| Bolus Insulin       |                 |                 |                |                    |

18. Do your blood glucose levels affect your exercise decisions? \*(Please select all that apply)

- I exercise when blood glucose is high
- I exercise when blood glucose is in target range
- I skip exercise when blood glucose is low
- I don't decide on exercise based on blood glucose levels
- I don't exercise
- Other: \_\_\_\_\_

19. Which of the following related to exercise affect your blood glucose? \*

|                           | Has effect | No effect | I don't know |
|---------------------------|------------|-----------|--------------|
| Intensity of exercise     |            |           |              |
| Type of exercise          |            |           |              |
| Duration of exercise      |            |           |              |
| Time of exercise          |            |           |              |
| Preexercise blood glucose |            |           |              |
| Preexercise snack/food    |            |           |              |

### Alcohol Intake Related Questions

20. Do you consume alcohol? \*

- Yes
- No

21. How often do you consume alcohol? \*

- Daily
- More than 4 times a week
- Less than 4 times per week, or 4 times per week
- Occasionally
- I don't drink
- Other: \_\_\_\_\_

22. Have you notice any effect of alcohol intake on your blood glucose? \*(Please select all that apply)

- Alcohol increases my blood glucose
- Alcohol decreases my blood glucose

- Alcohol increases and then decreases my blood glucose
- Alcohol decreases and then increases my blood glucose
- Alcohol has no effect on my blood glucose
- I don't know
- Other: \_\_\_\_\_

23. What type of alcohol do you consume? \*(Please select all that apply)

- Beer
- Wine
- Spirits/Hard alcohol
- Mixed drinks
- I don't drink
- Other: \_\_\_\_\_

24. If you consume alcohol, when do you check your blood glucose? \*(Please select all that apply)

- Before
- After
- During
- I don't check blood glucose
- Other: \_\_\_\_\_

25. How do you know about the effects of alcohol on blood glucose? \*(Please select all that apply)

- Physician/Nurse
- Web site
- From other patients
- Trial and error
- Pamphlets or books
- I don't know much about the effects
- Other: \_\_\_\_\_

26. How do you compensate for your blood glucose levels related to alcohol? \*(Please select all that apply)

|                     | Before alcohol | During alcohol intake | After alcohol | I don't compensate |
|---------------------|----------------|-----------------------|---------------|--------------------|
| Remove insulin pump |                |                       |               |                    |
| Eat food            |                |                       |               |                    |
| Adjust basal rate   |                |                       |               |                    |
| Bolus insulin       |                |                       |               |                    |

27. How do you calculate carbs when you consume alcohol? \*(Please select all that apply)

- Drink label
- Online database
- Personal estimation
- Clinician's or Educator's suggested approach
- I don't calculate
- Other: \_\_\_\_\_

28. Do you compensate for your alcohol's carbs? \*

- Always
- Sometimes

- [.] Depends on drink type/count
- [.] Only when the blood glucose is high
- [.] Never
- [.] Other: \_\_\_\_\_

29. Which of the following related to alcohol affect your blood glucose? \*

|                         | Has effect | No effect | I don't know |
|-------------------------|------------|-----------|--------------|
| Time of consumption     |            |           |              |
| When combined with food |            |           |              |
| Type of drink           |            |           |              |
| Number of drinks        |            |           |              |
| Blood glucose levels    |            |           |              |
| Prealcohol food         |            |           |              |

### General Questions

30. Do you disconnect your insulin pump for any reason other than exercise? Provide details \*

31. Do you change your insulin pump endocrine settings (basal rate, preset factors) for any reason without clinician's advice? Provide details \*

32. Do you change the insulin bolus delivery waveform pattern in the insulin pump? Provide details \*

33. Do you override bolus suggestions from the insulin pump for any reason? Provide details \*

34. Do you bolus to compensate for blood glucose without any carbs intake? Provide details \*

35. Do you bolus to compensate for carbs without adjusting for blood glucose levels? Provide details \*
